# Supplementary material for: Sofosbuvir-based regimen is safe and effective for hepatitis C infected patients with stage 4–5 chronic kidney disease: a systematic review and meta-analysis
Source: Springer Nature journal article supplement (doi:10.1186/s12985-019-1140-x), 2019-03-14

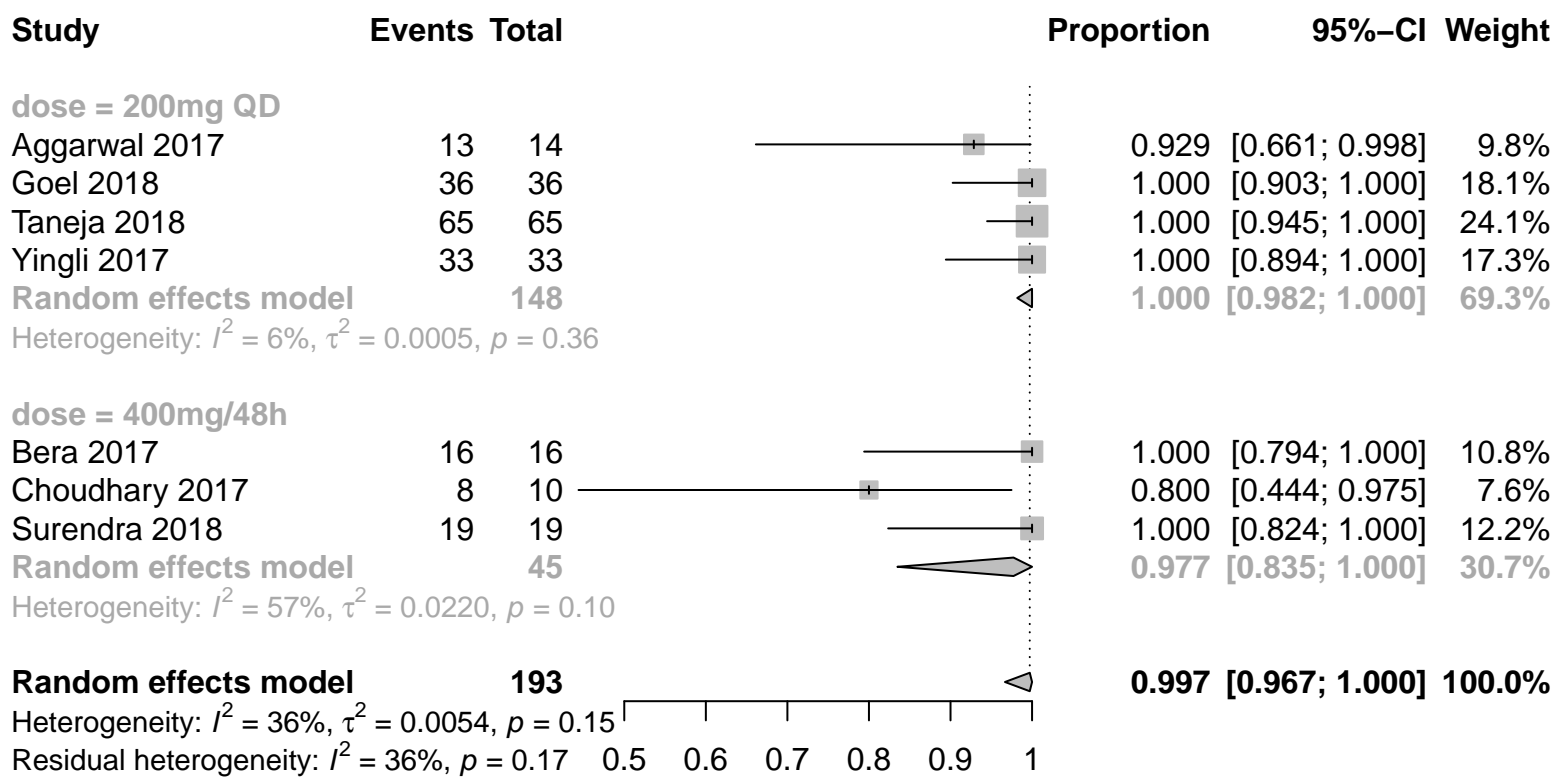

Supplement: MOESM3 [file 16549184]
